# Supplementary material for: The Impact of Sports Involvement on Body Image Perception and Ideals: A Systematic Review and Meta-Analysis
Source: MDPI journal article supplement (doi:10.3390/ijerph20065228), 2023-03-22
Supplement: s1 [file s1]

Archive with 2 entries (2 files):
- ijerph-2280098.Table S1 PRISMA CHECKLIST.pdf
- ijerph-2280098.Table S2 NOS.pdf
