# Supplementary material for: The Impact of Sports Involvement on Body Image Perception and Ideals: A Systematic Review and Meta-Analysis
Source: MDPI journal article supplement (doi:10.3390/ijerph20065228), 2023-03-22
Supplement: s1 [file s1 › ijerph-2280098.Table S2 NOS.pdf]

Table S2: Assessment of risk of bias of included studies by NOS (score: 0-16, with higher scores indicating low risk of bias). Each item is followed by its range.

| <b>Reference</b>                        | <b>Clarity of stated aim (0-2)</b> | <b>Sample representativeness (0-2)</b> | <b>Sample Size (0-2)</b> | <b>Non-respondents (0-2)*</b> | <b>Ascertainment of the exposure (0-2)</b> | <b>Control of confounding factors (0-1)</b> | <b>Comparability (0-1)</b> | <b>Assessment of the outcome (0-2)</b> | <b>Statistical tests (0-2)</b> | <b>NOS score</b> |
|-----------------------------------------|------------------------------------|----------------------------------------|--------------------------|-------------------------------|--------------------------------------------|---------------------------------------------|----------------------------|----------------------------------------|--------------------------------|------------------|
| Borrione et al. (2013) [28]             | 2                                  | 1                                      | 1                        | 0                             | 2                                          | 1                                           | 1                          | 1                                      | 2                              | 11               |
| Cardoso et al. (2021) [30]              | 2                                  | 2                                      | 1                        | 0                             | 2                                          | 1                                           | 1                          | 1                                      | 2                              | 12               |
| Da Silva et al. (2016) [31]             | 2                                  | 0                                      | 0                        | 0                             | 2                                          | 0                                           | 1                          | 1                                      | 0                              | 6                |
| Devrim et al. (2018) [32]               | 2                                  | 1                                      | 1                        | 0                             | 2                                          | 1                                           | 1                          | 1                                      | 1                              | 10               |
| de Medeiros Eufrásio et al. (2021) [34] | 2                                  | 1                                      | 2                        | 0                             | 2                                          | 0                                           | 1                          | 1                                      | 2                              | 11               |
| Francisco et al. (2012) [23]            | 2                                  | 1                                      | 1                        | 0                             | 2                                          | 1                                           | 1                          | 2                                      | 2                              | 12               |
| Francisco et al. (2013) [36]            | 2                                  | 1                                      | 1                        | 0                             | 2                                          | 1                                           | 1                          | 2                                      | 2                              | 12               |
| Godoy-Izquierdo and Díaz (2021) [38]    | 2                                  | 1                                      | 1                        | 0                             | 2                                          | 1                                           | 0                          | 1                                      | 2                              | 10               |
| Kong and Harris (2015) [40]             | 2                                  | 2                                      | 2                        | 0                             | 2                                          | 0                                           | 1                          | 1                                      | 0                              | 10               |
| Krentz and Warschburger (2013) [41]     | 2                                  | 1                                      | 1                        | 2                             | 2                                          | 0                                           | 1                          | 1                                      | 1                              | 11               |
| Pinto et al. (2019) [42]                | 2                                  | 0                                      | 0                        | 0                             | 2                                          | 0                                           | 0                          | 1                                      | 0                              | 5                |
| Santarnecki and Dettore (2012) [45]     | 2                                  | 0                                      | 0                        | 0                             | 2                                          | 0                                           | 1                          | 1                                      | 1                              | 7                |
| Torres-McGehee et al. (2012) [46]       | 2                                  | 1                                      | 2                        | 1                             | 2                                          | 1                                           | 1                          | 1                                      | 2                              | 13               |
| Voelker et al. (2014) [48]              | 2                                  | 2                                      | 2                        | 1                             | 2                                          | 1                                           | 1                          | 1                                      | 2                              | 14               |
| Voelker et al. (2017) [49]              | 2                                  | 1                                      | 1                        | 0                             | 2                                          | 0                                           | 0                          | 1                                      | 2                              | 9                |

\*As carried out previously [55], we assigned the score 0 to "iii. One or none of three" in the Non-respondents category of the NOS adapted scale [27].
